# Supplementary material for: SSRP1-mediated histone H1 eviction promotes replication origin assembly and accelerated development
Source: PubMed Central journal article supplement (PMC7067836; doi:10.1038/s41467-020-15180-5), 2020-03-12
Supplement: 41467_2020_15180_MOESM3_ESM.pdf [file 41467_2020_15180_MOESM3_ESM.pdf]

## **Description of Additional Supplementary Files**

File Name: Supplementary Data 1

Description: Proteins enriched in the fraction stimulating somatic nuclei replication

File Name: Supplementary Movie 1

Description: Time-lapse movie of twelve individual developing embryos. The top panel shows embryos injected with buffer. The lower panel shows embryos injected with Myc-SSRP1 mRNA.

File Name: Supplementary Movie 2

Description: Time-lapse movie of twelve individual developing embryos. The top panel shows embryos injected with buffer. The lower panel shows embryos injected with Myc- $\Delta$ NTD mRNA.

File Name: Supplementary Movie 3

Description: Time-lapse movie of twelve individual developing embryos. The top panel shows embryos injected with buffer. The lower panel shows embryos injected with Myc-NTD mRNA.
